# Supplementary material
Source: Springer Nature journal article supplement (https://www.springermedizin.de/resource/supplementary/12992_2012_187_MOESM6_ESM.pdf/9616772)
Supplement: MOESM6 [file 9616772]

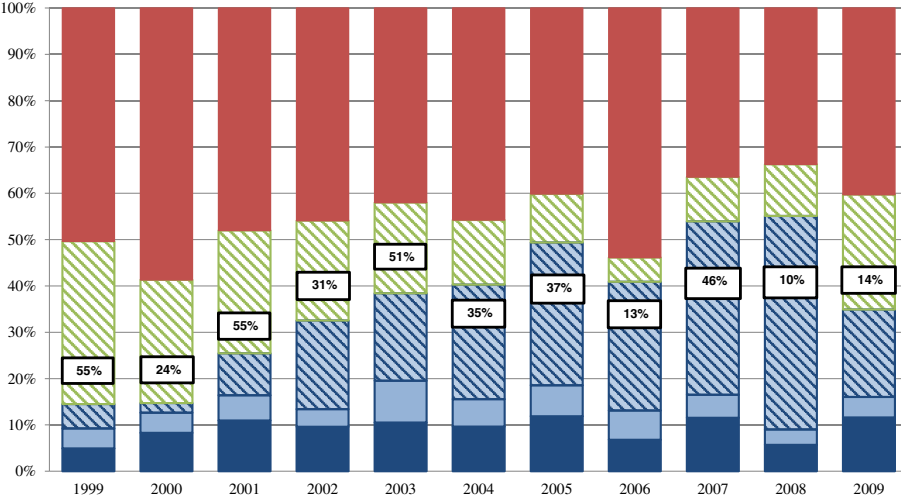

■ Poverty Action Funds (Sector Budget Support)

■ Poverty Action Funds (HIPC Debt Relief)

■ Poverty Action Funds (GOU + GBS)

■ General Resources (GOU + GBS)

■ Project Support

■ % Contribution of GBS to General Resources
